Articles of interest in other COB journals

From *Journal of Cell Science*

**The stimulation of dendrite growth by Sema3A requires integrin engagement and focal adhesion kinase**

Uwe Schlomann, Jens C. Schwamborn, Myriam Müller, Reinhard Fässler and Andreas W. Püschel

Schlomann, U. et al. 2009. *J. Cell Sci.* doi:10.1242/jcs.038232

**A novel genetic mechanism regulates dorsolateral hinge-point formation during zebrafish cranial neurulation**

Molly K. Nyholm, Salim Abdelilah-Seyfried and Yevgenya Grinblat

Nyholm, M. K. et al. 2009. *J. Cell Sci.* doi:10.1242/jcs.043471
